# Supplementary material for: A record from an active asteroid preserved in a carbonaceous chondrite
Source: Research Square preprint supplement (doi:10.21203/rs.3.rs-1247961/v1), 2022-02-02
Supplement: Supplementary file 1 [file 9ed9c390c97768c8bca04c3d.docx]

Supplementary information

**A record from an active asteroid preserved in a carbonaceous chondrite**

Xin Yang1,2,3*, Romy D. Hanna4, Andrew M. Davis1,3,5, April I. Neander6, Philipp R. Heck1,2,3

1Department of the Geophysical Sciences, The University of Chicago, Chicago, IL 60637, USA

2Robert A. Pritzker Center for Meteoritics and Polar Studies, Negaunee Integrative Research Center, Field Museum of Natural History, Chicago, IL, USA

3Chicago Center for Cosmochemistry, The University of Chicago, Chicago, IL 60637, USA.

4Jackson School of Geosciences, University of Texas, Austin, TX 78712, USA

5Enrico Fermi Institute, The University of Chicago, Chicago, IL 60637, USA.

6Department of Organismal Biology and Anatomy, The University of Chicago, Chicago, IL 60637, USA.

**Supplementary Figs. 1–6**

**Supplementary Table 1**


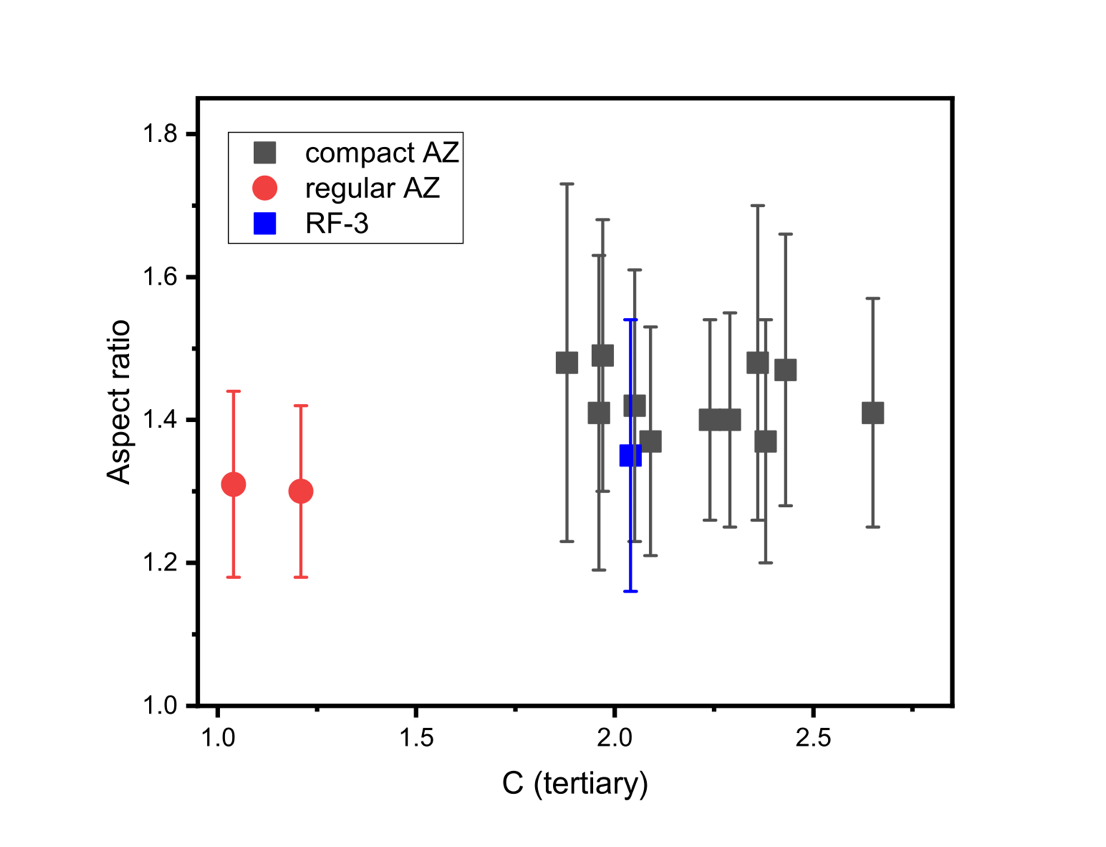


**Supplementary Fig. 1. 3D aspect ratios of fitted ellipsoids of chondrules in AZ fragments versus C parameters.** Two groups, regular AZ and compact AZ, are clearly separated, with RF-3 in the compact group. Error bars are one standard deviation (n=22­–85).


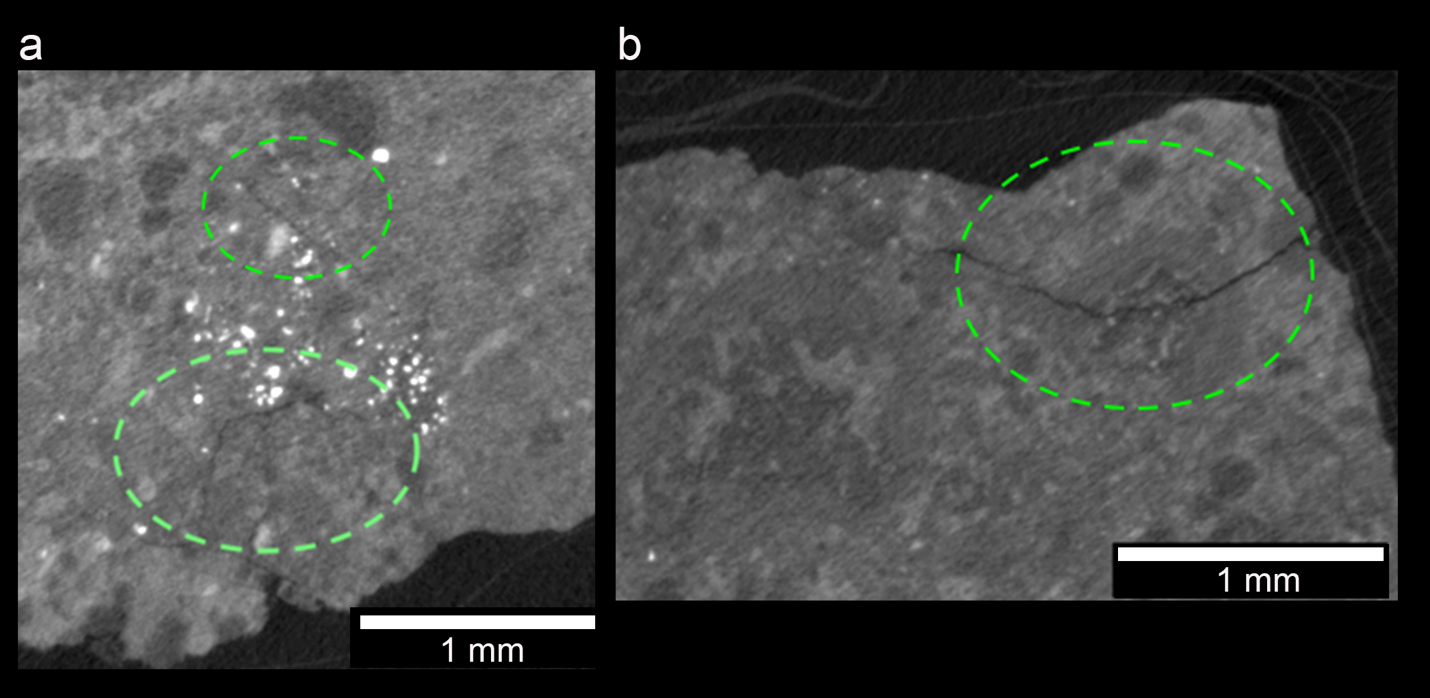


**Supplementary Fig. 2. μCT images of one regular AZ fragment RF-1.** Fractures are indicated by green ellipses in **a** and **b**.

**Supplementary Fig. 3. Pressure profiles for bodies with varying sizes.** The left panel shows that the maximum pressure (center pressure) within a spherical body increases quadratically with the radius. The right panel displays that the local pressure within a body with a radius of 100 km increases quadratically with the depth below the surface.


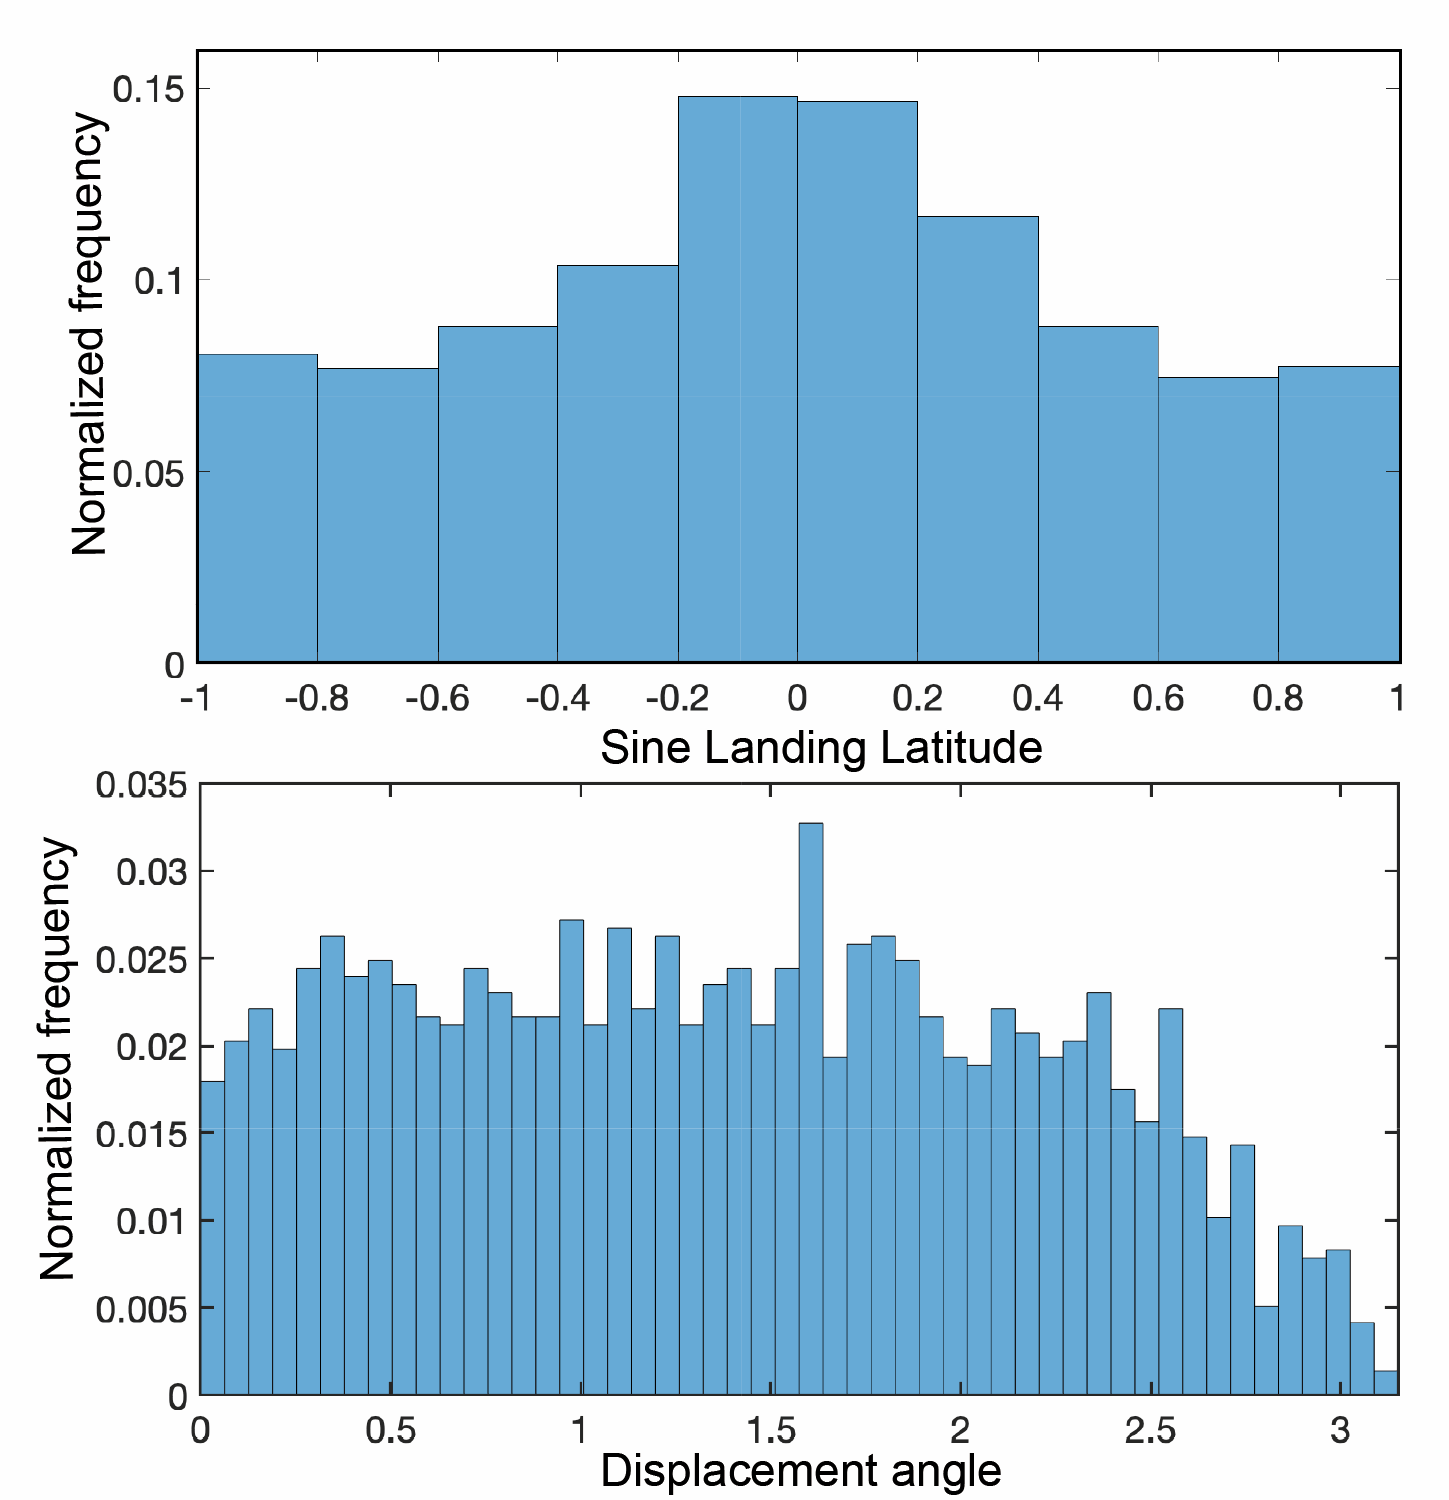


|  |
| --- |

**Supplementary Fig. 4. Distributions of absolute locations (upper panel) and of displacement angles (lower panel) for redeposition onto a Bennu-like asteroid.** The center body has the same size and bulk density as that of Bennu (490 m in diameter and 1.26 g cm–3 in bulk density).


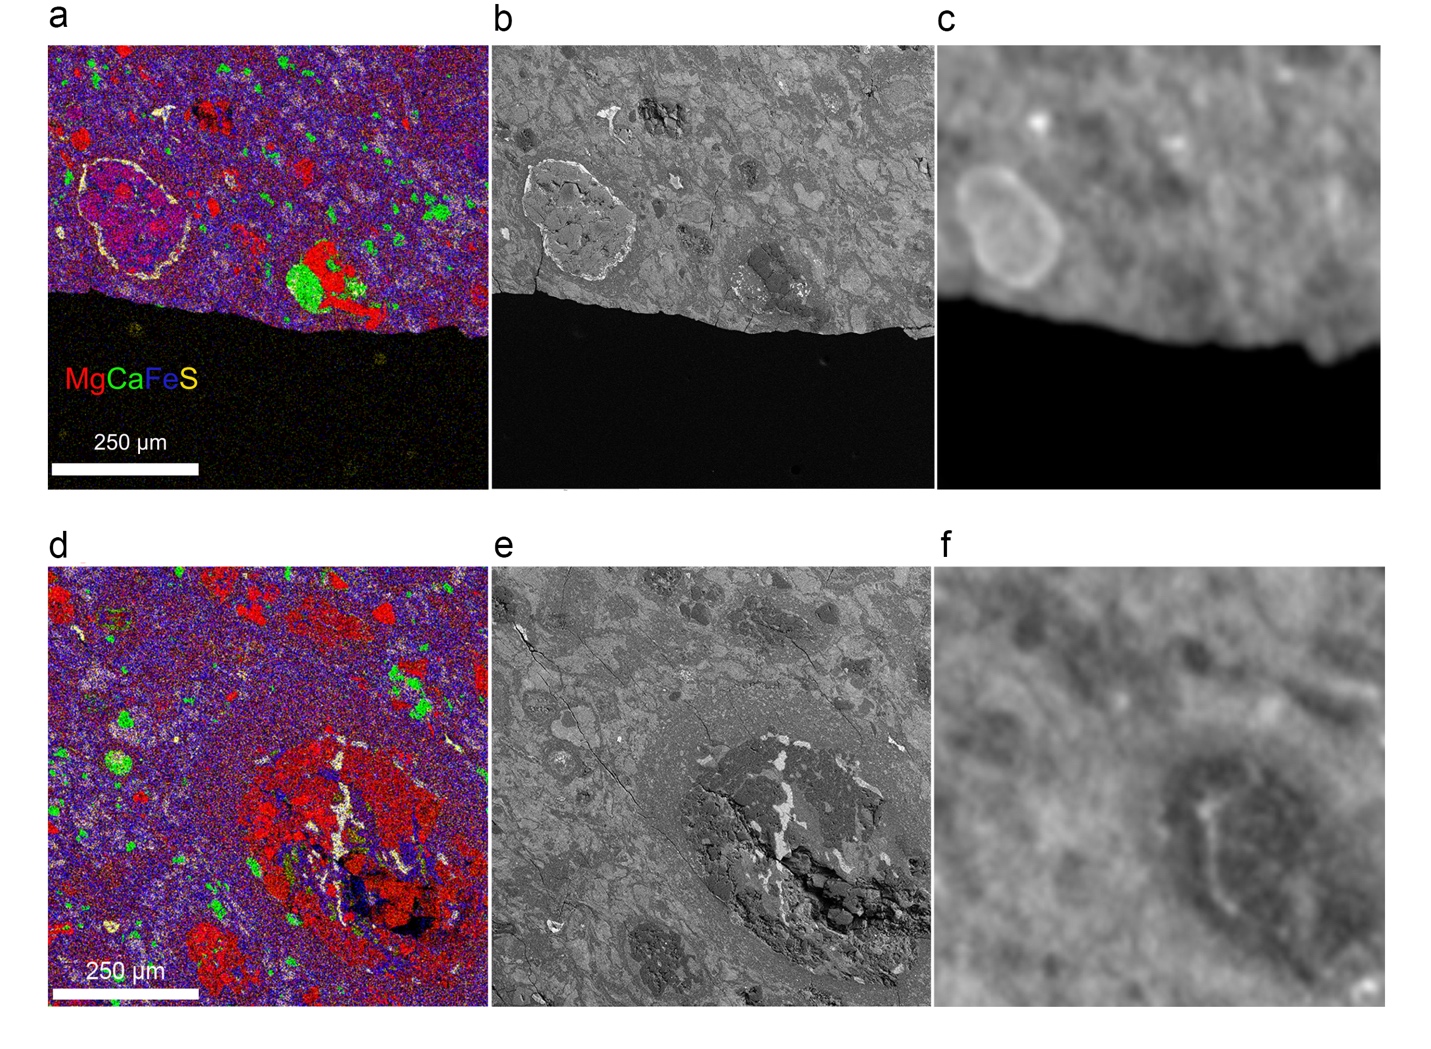


**Supplementary Fig. 5. EDS, BSE, and μCT images of CF-10.** **a**, EDS map from CF-10 shows a sulfide rim surrounding a chondrule. **b**, BSE image of the same area as **a** with bright sulfide chondrule rim. **c**, μCT cross-section of approximately the same position as **a** with a light-toned chondrule on the left. **d**, EDS map of CF-10 shows sulfide veins (yellow) in a chondrule (lower right). **e**, BSE image of the same area as **d** and bright veins in the chondrule. **f**, μCT data of approximately the same position as **d** with a dark-toned object (chondrule) in the lower right.


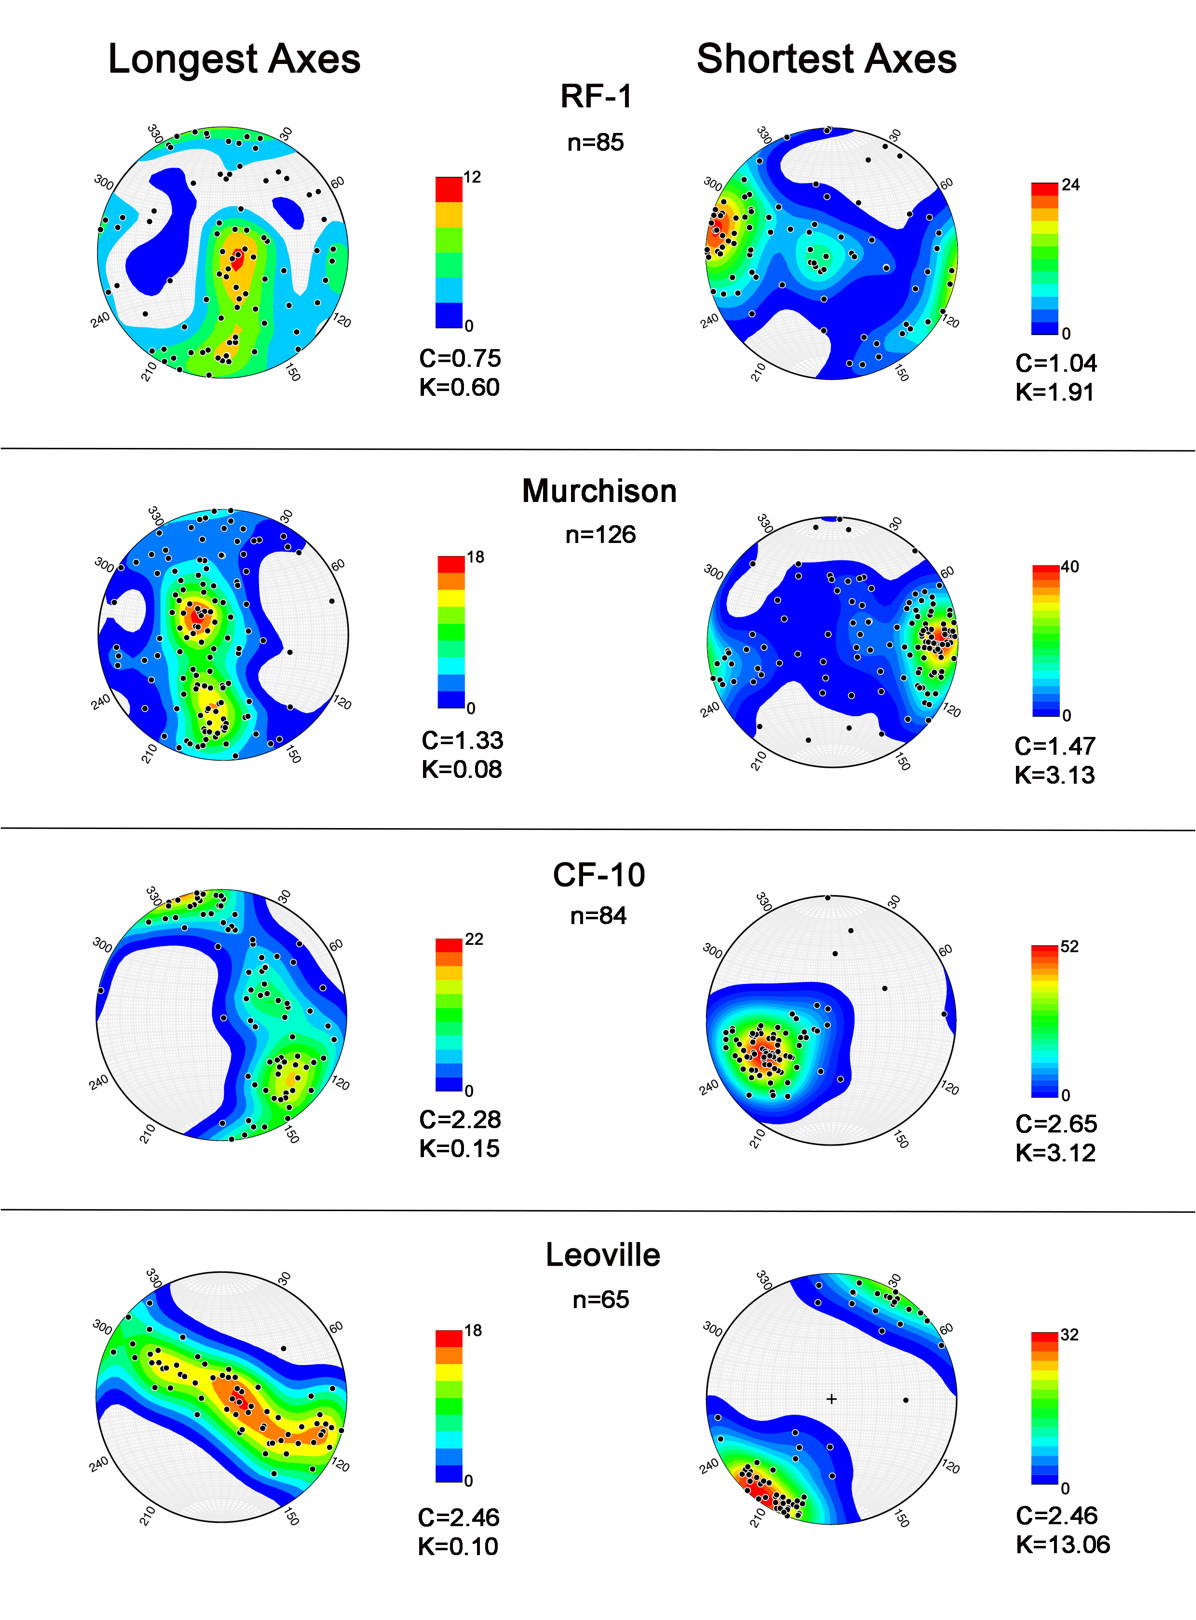


**Supplementary Fig. 6. Chondrule ellipsoid orientations.** n is the number of best-fitted ellipsoids and the color bar represents the density contour values. For compact fragment CF-10 and Leoville, girdling of longest axes and clustering of shortest axes show a moderately strong foliation. A weak fabric is suggested by the contour for Murchison, and no fabric is evident in RF-1.

**Supplementary Table 1.** Parameters of μCT scanned fragments and chondrule best-fit ellipsoids.

|  | **Compact AZ** | | | | | | | | | | | | | **Regular AZ** | | | **Reference** | | |
| --- | --- | --- | --- | --- | --- | --- | --- | --- | --- | --- | --- | --- | --- | --- | --- | --- | --- | --- | --- |
|  | CF1 | CF2 | CF3 | CF4 | CF5 | CF6 | CF7 | CF8 | CF9 | CF10 | CF11 | RF3 | RF1 | | RF2 | Murchison | | Leoville |
| Mass (g) | 0.079 | 0.027 | 0.163 | 0.122 | 0.062 | 0.109 | 0.098 | 0.185 | 0.213 | 0.591 | 0.594 | 0.088 | 0.730 | | 0.123 | 1.171 | | 1.706 |
| Density (g cm–3) | 2.72 | 2.75 | 2.72 | 2.73 | 2.75 | 2.72 | 2.71 | 2.72 | 2.72 | 2.73 | 2.71 | 2.55 | 2.41 | | 2.44 |  | |  |
| Aspect ratio* (δ§) | 1.40 (0.15) | 1.48 (0.22) | 1.40 (0.14) | 1.48 (0.25) | 1.49 (0.19) | 1.37 (0.17) | 1.41 (0.22) | 1.42 (0.19) | 1.47 (0.19) | 1.41 (0.16) | 1.37 (0.16) | 1.35 (0.19) | 1.31 (0.13) | | 1.30 (0.12) | 1.30 (0.15) | | 1.50 (0.18) |
| Elongation† (δ§) | 1.14 (0.08) | 1.18 (0.10) | 1.13 (0.08) | 1.18 (0.12) | 1.19 (0.10) | 1.14 (0.10) | 1.15 (0.10) | 1.13 (0.07) | 1.17 (0.13) | 1.13 (0.10) | 1.12 (0.08) | 1.13 (0.09) | 1.13 (0.08) | | 1.12 (0.06) | 1.12 (0.08) | | 1.18 (0.11) |
| Flatness‡ (δ§) | 1.23 (0.12) | 1.26 (0.14) | 1.25 (0.11) | 1.25 (0.17) | 1.26 (0.15) | 1.20 (0.12) | 1.23 (0.14) | 1.25 (0.15) | 1.26 (0.14) | 1.25 (0.12) | 1.22 (0.14) | 1.19 (0.15) | 1.16 (0.11) | | 1.16 (0.12) | 1.16 (0.11) | | 1.28 (0.14) |
| *C*longest | 1.98 | 2.53 | 1.81 | 1.62 | 1.98 | 2.08 | 2.04 | 1.44 | 2.45 | 2.28 | 2.19 | 1.67 | 0.75 | | 1.38 | 1.33 | | 2.46 |
| *K*longest | 0.19 | 0.23 | 0.09 | 0.33 | 0.22 | 0.12 | 0.12 | 0.20 | 0.40 | 0.15 | 0.15 | 0.28 | 0.60 | | 0.90 | 0.08 | | 0.10 |
| *C*shortest | 2.29 | 2.36 | 2.24 | 1.88 | 1.97 | 2.38 | 1.96 | 2.05 | 2.43 | 2.65 | 2.09 | 2.04 | 1.04 | | 1.21 | 1.47 | | 2.46 |
| *K*shortest | 4.91 | 1.97 | 4.26 | 4.22 | 7.04 | 2.31 | 7.21 | 6.73 | 18.17 | 3.12 | 6.53 | 3.07 | 1.91 | | 1.82 | 3.13 | | 13.06 |
| Longest axis length (μm) (δ§) | 146 (51) | 142 (54) | 184 (72) | 146 (62) | 167 (74) | 148 (50) | 150 (49) | 158 (51) | 186 (68) | 183 (88) | 210 (74) | 149 (43) | 196 (68) | | 161 (47) | 348 (190) | | 478 (216) |
| Secondary axis length (μm) (δ§) | 128 (44) | 121 (44) | 164 (66) | 123 (47) | 141 (63) | 130 (44) | 131 (44) | 139 (42) | 159 (55) | 161 (68) | 187 (64) | 132 (38) | 174 (59) | | 145 (44) | 310 (166) | | 408 (189) |
| Shortest axis length (μm) (δ§) | 104 (34) | 95 (29) | 131 (49) | 98 (35) | 110 (40) | 109 (36) | 108 (37) | 111 (31) | 126 (40) | 129 (53) | 153 (51) | 112 (33) | 152 (55) | | 125 (38) | 266 (134) | | 315 (131) |
| n | 23 | 22 | 28 | 47 | 25 | 43 | 41 | 45 | 68 | 84 | 63 | 36 | 85 | | 24 | 126 | | 65 |

* Longest axis length/shortest axis length.

† Longest axis length/secondary axis length.

‡ Secondary axis length/shortest axis length.

§1σ standard deviation
